# Supplementary material for: Chromosome-level genome assembly of Lilford’s wall lizard, Podarcis lilfordi (Günther, 1874) from the Balearic Islands (Spain)
Source: PubMed Central journal article supplement (PMC10214862; doi:10.1093/dnares/dsad008), 2023-05-04
Supplement: dsad008_suppl_supplementary_figure_s2.pdf [file dsad008_suppl_supplementary_figure_s2.pdf]

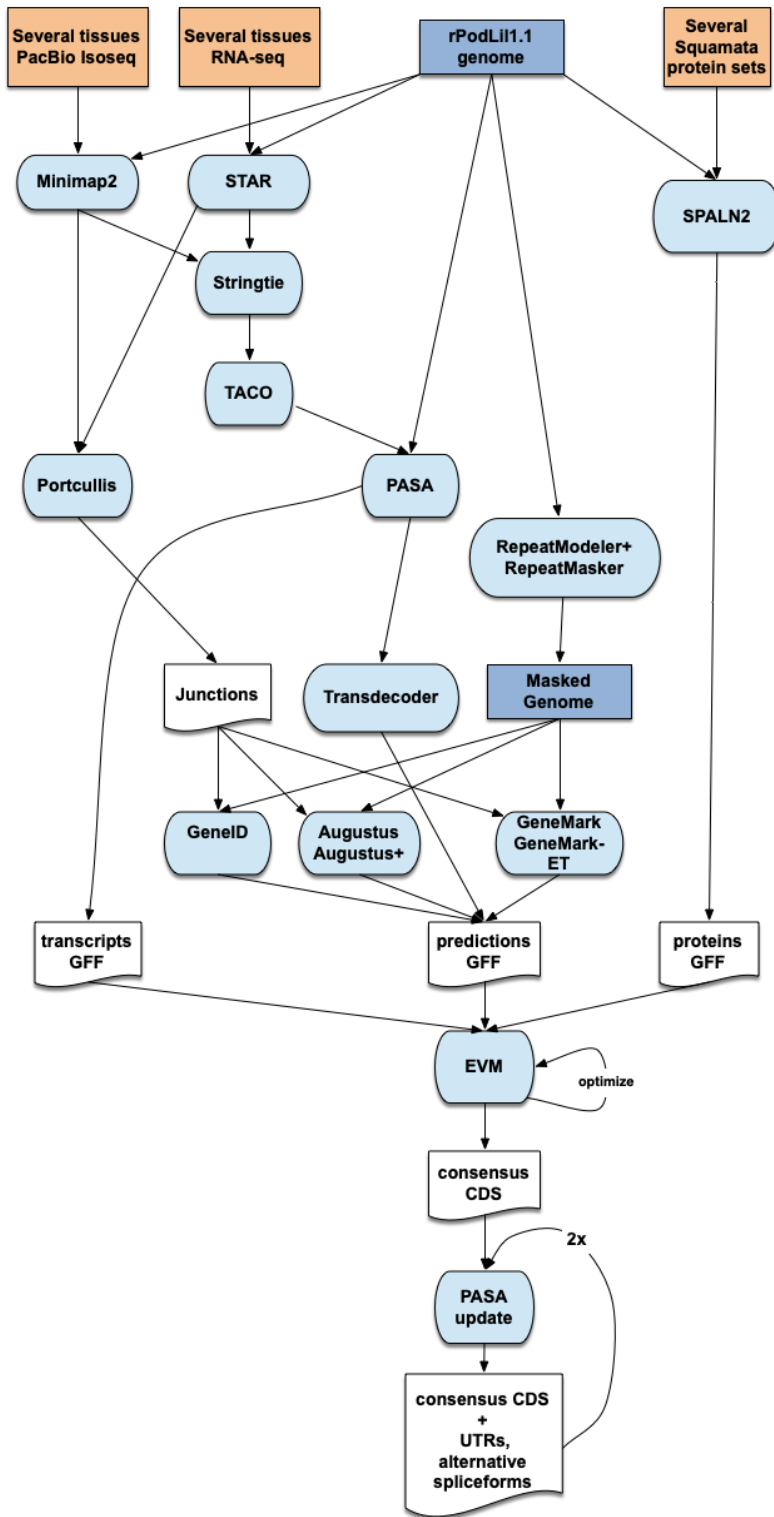

**Figure S2: Annotation flowchart based on the non-decontaminated assembly (rPodLil1.1).**
