# Supplementary material for: Chromosome-level genome assembly of Lilford’s wall lizard, Podarcis lilfordi (Günther, 1874) from the Balearic Islands (Spain)
Source: PubMed Central journal article supplement (PMC10214862; doi:10.1093/dnares/dsad008), 2023-05-04
Supplement: dsad008_suppl_supplementary_figure_s3.pdf [file dsad008_suppl_supplementary_figure_s3.pdf]

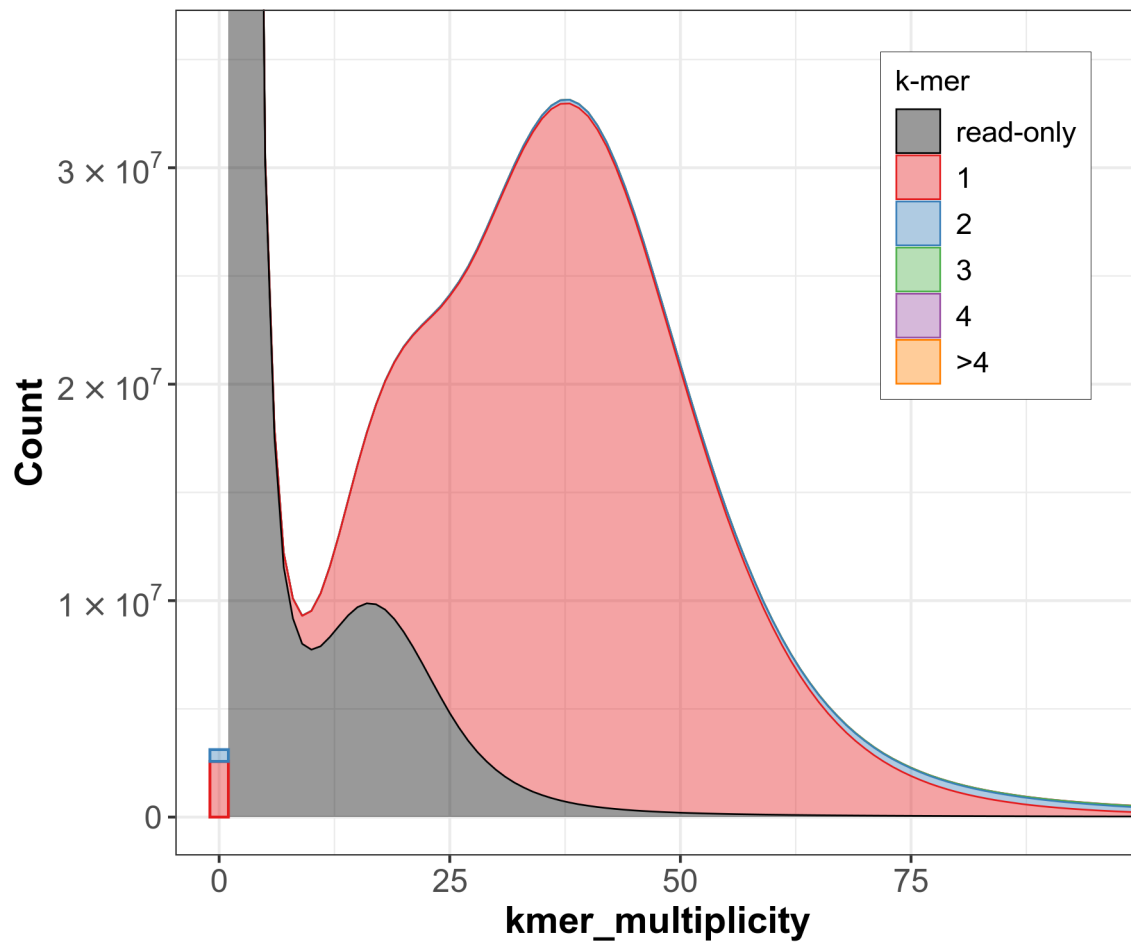

**Figure S3: K-mer comparison between the Illumina reads and the rPodLil1.2 assembly.** Stacked histogram of k-mer distributions obtained by comparing the assembly with Merqury v1.1 using  $k=21$  on the 10X Illumina reads. Artificial duplications corresponding to duplicate k-mers are shown in blue above the main peak ( $\sim 40x$ ). They only account for 0.68% of the k-mers.
