# Supplementary material for: Chromosome-level genome assembly of Lilford’s wall lizard, Podarcis lilfordi (Günther, 1874) from the Balearic Islands (Spain)
Source: PubMed Central journal article supplement (PMC10214862; doi:10.1093/dnares/dsad008), 2023-05-04
Supplement: dsad008_suppl_supplementary_figure_s4.pdf [file dsad008_suppl_supplementary_figure_s4.pdf]

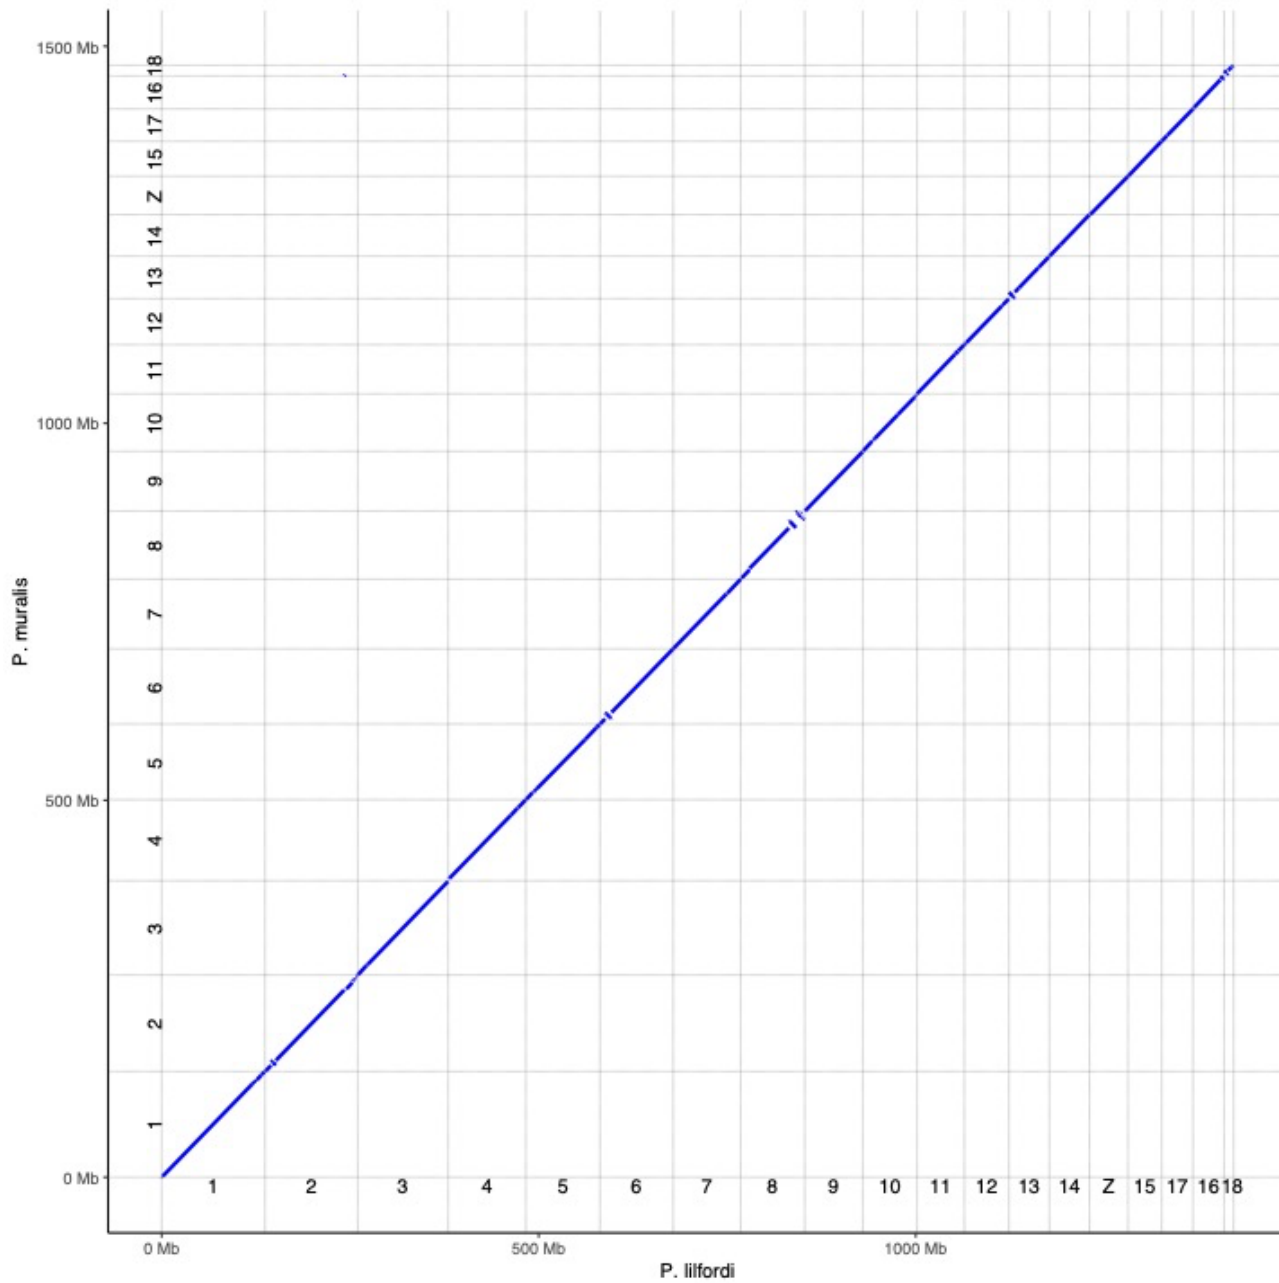

**Figure S4: Whole genome alignment of *P. lilfordi* to *P. muralis*.** Chromosomal sequences, named according to corresponding chromosomal sequences in *P. muralis*, are ordered from largest to smallest in *P. lilfordi* and oriented with respect to *P. muralis*, which inverts the order of chromosomes 16 and 17. Alignments longer than 100 kb were selected and visualized with the pafr R library.
