# Supplementary material for: Chromosome-level genome assembly of Lilford’s wall lizard, Podarcis lilfordi (Günther, 1874) from the Balearic Islands (Spain)
Source: PubMed Central journal article supplement (PMC10214862; doi:10.1093/dnares/dsad008), 2023-05-04
Supplement: dsad008_suppl_supplementary_figure_s5.pdf [file dsad008_suppl_supplementary_figure_s5.pdf]

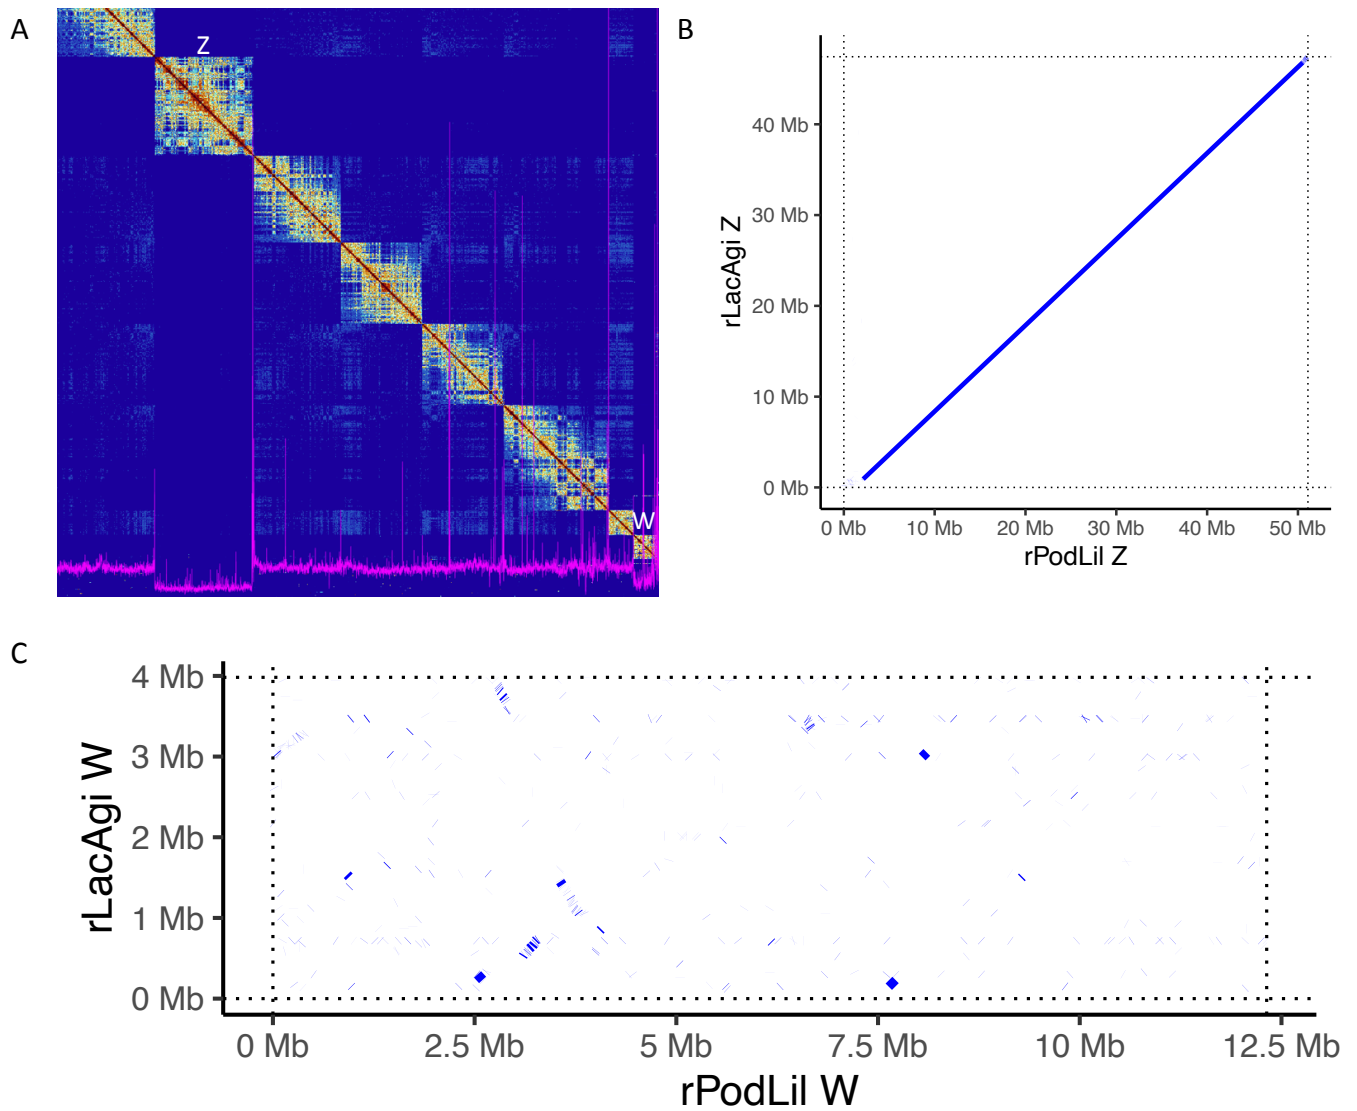

**Figure S5: Sexual chromosome assignment.** (A) Hi-C contact map showing scaffolds corresponding to the sexual chromosomes. Illumina coverage is plotted in pink. (B) Alignment of the scaffold assigned to the Z chromosome in *L. agilis* against the corresponding scaffold in *P. lilfordi*. (C) Alignment of the scaffold assigned to the W chromosome in *L. agilis* against the corresponding scaffold in *P. lilfordi*.
